# Supplementary material for: MED12 mutation activates the tryptophan/kynurenine/AHR pathway to promote growth of uterine leiomyomas
Source: JCI journal article supplement (doi:10.1172/jci.insight.171305), 2023-08-22

Supplemental Material for

**MED12 Mutation Activates Tryptophan-Kynurenine-AHR Pathway to Promote Growth of Uterine Leiomyoma**

Azna Zuberi<sup>1\*</sup>, Yongchao Huang<sup>2\*</sup>, Ariel J. Dotts<sup>1</sup>, Helen Wei<sup>1</sup>, John S. Coon V<sup>1</sup>, Shimeng Liu<sup>1</sup>, Takashi Iizuka<sup>1</sup>, Olivia Wu<sup>1</sup>, Olivia Sotos<sup>1</sup>, Priyanka Saini<sup>1</sup>, Debabrata Chakravarti<sup>1</sup>, Thomas G Boyer<sup>3</sup>, Yang Dai<sup>2†</sup>, Serdar E Bulun<sup>1†‡</sup>, Ping Yin<sup>1†‡</sup>

Corresponding authors:

Serdar E. Bulun: s-bulun@northwestern.edu

Ping Yin: p-yin@northwestern.edu

## Supplemental Methods

### Genotyping for *MED12* mutation in LM

Total RNA or genomic DNA was isolated from fresh tissues or primary cells using the AllPrep DNA/RNA mini kit (Cat no: 80204, Qiagen) per the manufacturer's instructions. Genomic DNA or cDNA was amplified using a hot start DNA polymerase kit (Cat no: 71086-3, Sigma-Aldrich) and primers as previously described (1, 2). The PCR products were purified and sequenced at AGCT Incorporated. The sequences were analyzed using Indigo software ([www.gear-genomics.com/indigo](http://www.gear-genomics.com/indigo)) and compared with the human *MED12* reference sequence from NCBI (NM\_005120). Information on race/ethnicity and *MED12* mutation status for the patient samples used in this study is listed in Supplemental Table 1.

### TDO2 and AHR siRNA knockdown

LM cells were transfected with 100 nM human *TDO2* siRNA, *AHR* siRNA, or non-targeting control siRNA using DharmaFECT 1 (Cat no: T-2001-02, Dharmacon) transfection reagent following the manufacturer's instructions. Information about the siRNA used is provided in Supplemental Table 19. To determine the effects of Kyn on AHR-mediated gene expression, after 24 h of transfection of *AHR* siRNA, the cells were starved with Trp- and phenol-red free Dulbecco's Modified Eagle's Medium (DMEM)/F12 medium (Cat no: CS050-01, US Biological Life Sciences) supplemented with 0.2% charcoal stripped (CS)-FBS (starvation medium) for 24 h, followed by treatment with Kyn (200  $\mu$ M) or vehicle for 48 h in starvation medium. The cells were transfected with *TDO2* siRNA following the same protocol and incubated in phenol-red free DMEM/F12 medium (containing 44  $\mu$ M Trp, Cat no: 11039-047, Thermo Fisher Scientific,) supplemented with 0.2% CS-FBS for 72 h before harvested for RNA isolation.

### RNA isolation and real-time qPCR

Total RNA was isolated using the RNeasy mini kit (Cat no: 74106, Qiagen). cDNA was synthesized using qScript cDNA SuperMix (Cat no: 95048-100, VWR International) and mRNA levels of *TDO2*, *IDO1*, *IDO2*, *AHR*, *CYP1B1*, and *CYP1A1* were quantified using RT-qPCR (QuantStudio 12K Flex, Applied Biosystems Waltham) with Taqman Universal Mastermix (Cat no: 4364338, Thermo Fisher Scientific) and normalized to TATA-BOX Binding Protein (TBP), glyceraldehyde-3-phosphate dehydrogenase (GAPDH), or 18sRNA. The primers used for RT-qPCR are listed in the Supplemental Table 19. Expression levels were calculated by applying the comparative cycle threshold (Ct) method. To determine the effects of CDK8 specific inhibitor SEL120-34A (Cat no: S8840, Selleck Chemicals LLC) on *TDO2* gene expression, the cells were starved in phenol-red free DMEM/F12 medium with 0.2% CS-FBS for 24 h followed by treatment with vehicle (DMSO) or different doses (1, 5, 10, 100 1000 nM) of CDK8 inhibitor for 24h before harvesting for RNA isolation and protein extraction.

### Cell viability assay

The effects of Trp (Cat no: S3987, Selleck Chemicals), the *TDO2* specific inhibitors 680C91 (Cat no: SML0287-5MG, Sigma-Aldrich) and LM10 (Cat no: T4410, TargetMol), Kyn (Cat no: K8625-25MG, Sigma-Aldrich), and the AHR-selective antagonist CH223191 (Cat no: T2448, TargetMol) on MyoF and LM cell viability were assessed using the Cell Counting Kit-8 (CCK-8) (Cat no: CK04-05; Dojindo) following the manufacturer's protocol. The kit utilizes a highly water-soluble tetrazolium salt, WST-8, which produces a water-soluble formazan dye upon reduction in the presence of an electron mediator. The amount of formazan generated by dehydrogenases is directly proportional to the number of living cells. Briefly, 5000-7000 primary MyoF or LM cells were seeded in 100  $\mu$ l of DMEM/F12 medium containing 10% FBS and 1% antibiotic/antimycotic in a standard 96-well plate until 75-80% confluency. Then the cells were starved for 24 h and

treated with Trp (35, 70, 150  $\mu$ M), 680C91 (5, 10, 15  $\mu$ M), LM10 (25, 50, 100  $\mu$ M), Kyn (50, 100, 200  $\mu$ M), CH223191 (5, 10, 15  $\mu$ M), or vehicle (Trp and Kyn were dissolved in H<sub>2</sub>O and the others were dissolved in DMSO). To assess the effects of Trp or Kyn, the cells were treated in Trp- and phenol red-free medium containing 0.2% CS-FBS. Otherwise, the cells were treated in phenol red free DMED/F12 medium with 0.2% CS-FBS. After 24 h of treatment, 10  $\mu$ l of CCK-8 solution was added to each well and incubated for 3 h before measuring the absorbance at 450 nm using a microplate reader.

### **Cell apoptosis assay**

Apoptosis was measured using the Caspase-Glo 3/7 Assay kit (Cat no: PRG8090, Promega) following the manufacturer's instructions. MyoF and LM cells were seeded in a white-walled 96-well plate and treated with vehicle, Kyn, CH223191, Trp, 680C91, or LM10 for 24 h, as described for the viability assay above. At the end of the treatment, 100  $\mu$ l of Caspase-Glo<sup>®</sup> 3/7 reagent was added to each well followed by incubation at room temperature for 3 h. The luminescence of each sample was measured using a microplate reader.

### **Immunofluorescent staining**

LM cells were grown on glass coverslips in 6-well plates until approximately 60% confluency. The cells were starved in Trp- and phenol red-free DMEM/F12 medium containing 0.2% CS-FBS for 24 h followed by treatment with 200  $\mu$ M Kyn for 24 h. The cells were fixed with freshly prepared 4% paraformaldehyde in phosphate-buffered saline (PBS) for 10 min and permeabilized with 0.5% Triton X-100 in PBS for 5 min at room temperature. Then the cells were blocked with 5% BSA in PBS for 1 h followed by incubation with anti-AHR antibody (1:500 in 1% BSA, Supplemental Table 19) overnight at 4°C. The cells were then incubated with Alexa Fluor Plus 555 conjugated goat anti-mouse IgG (H+L) secondary antibody (Supplemental Table 19) for 1 h followed by incubation in DAPI (0.5  $\mu$ g/ml, Cat no: 50-196-4625, Thermo Fisher Scientific) for 5 min at room temperature. Images were captured by a Leica DM5000 B microscope with an attached Leica DFC450 C digital microscope camera (Leica) and quantified by ImageJ.

### **ChIP-qPCR**

LM cells were treated with 200  $\mu$ M Kyn for 90 min, followed by crosslinking with 1% paraformaldehyde for 10 min and quenching with 1X glycine for 5 minutes at room temperature. Chromatin was isolated as described for ChIP-seq. Chromatin immunoprecipitation was performed using ChIP-validated AHR antibody (Supplemental Table 19). The immunoprecipitated DNA was purified and analyzed by RT-qPCR to assess the effects of Kyn treatment on AHR binding at the *CYP1A1* and *CYP1B1* gene loci using previously published primers (3). Normal rabbit IgG was used as a negative control. The data were analyzed by the percent input method.

### **Immunoblot analysis**

LM cells were transfected with *AHR* siRNA or *TDO2* siRNA as described above for *TDO2* and *AHR* siRNA knockdown. 24 h after transfection, the cells were maintained in phenol red free DMEM/F12 with 0.2% CS-FBS for 72 h before harvested for the assay. Frozen MyoF or LM tissues were finely grounded with a mortar and pestle in liquid nitrogen. The protein from LM cells or frozen tissues was extracted using RIPA buffer containing protease inhibitor (Cat no: 11836170001, Sigma-Aldrich) and quantified using the BCA assay kit. The protein samples were prepared using 4X LDS sample buffer (Cat no: NP0007, Thermo Fisher Scientific) and electrophoresed on a 4% to 12% Novex Bis-Tris polyacrylamide precast gel (Cat no: NP0335BOX, Thermo Fisher Scientific). The protein was transferred to polyvinylidene difluoride membranes, which were incubated with primary antibodies (1:1000, AHR, TDO2, or Cyclin D1, Supplemental Table 19) at 4°C overnight.  $\beta$ -ACTIN was used as a loading control. The membranes were then incubated with horseradish peroxidase-conjugated secondary antibody for

1 h at room temperature. The membranes were developed using Luminata Crescendo horseradish peroxidase substrate (Cat no: WBLUR0500, Millipore Sigma) and imaged and quantified using iBright. Our group recently engineered a heterozygous *MED12* G44N mutation in an immortalized uterine smooth muscle cell line using CRISPR and found that G44N mut-*MED12* stimulates TDO2 expression (4). The protein isolated from primary mut-*MED12* LM cells transfected with control siRNA or *TDO2* siRNA, and from G44N mut-*MED12* and the control wt-*MED12* cell lines was used as a control for TDO2 protein detection.

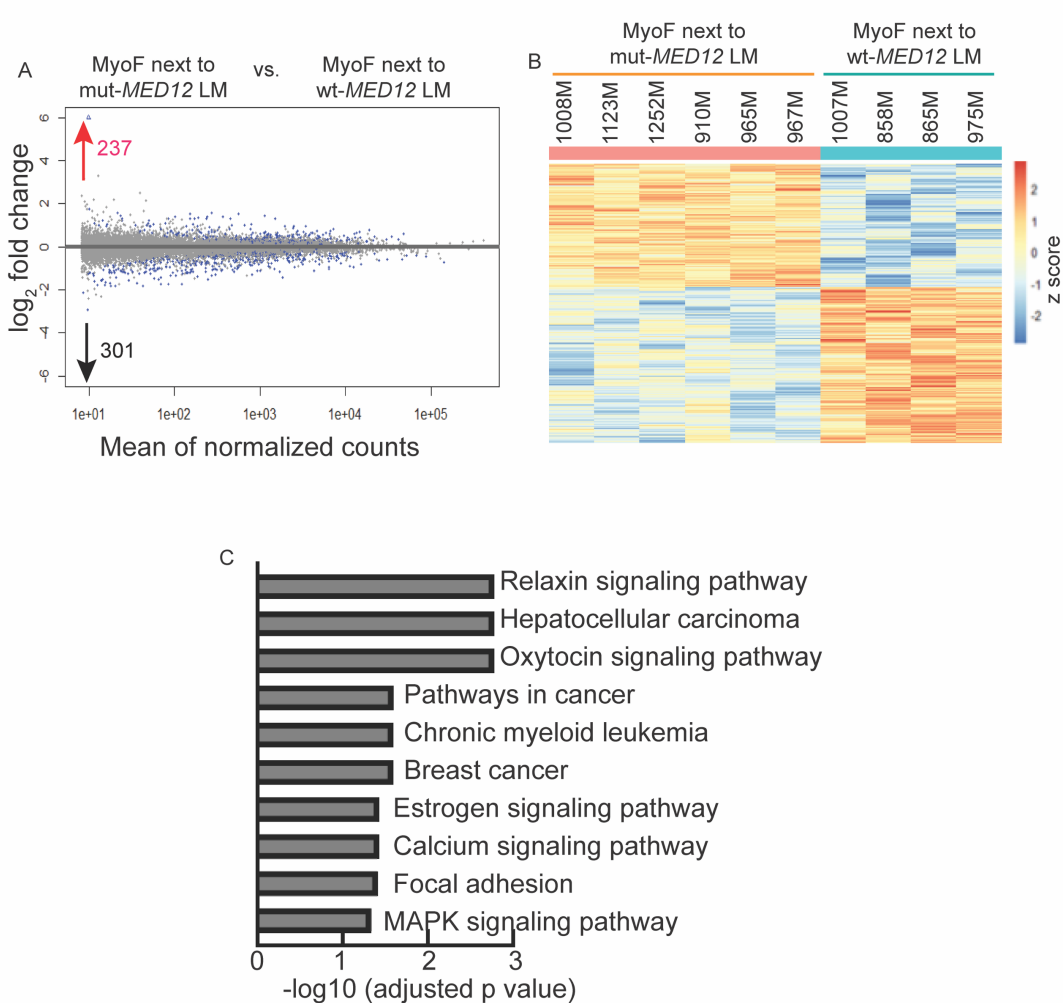

**Supplemental Figure 1:** (A) MA (log<sub>2</sub> fold change and means average) plot and (B) heat map showing changes in gene expression (up- and down-regulated) in MyoF adjacent to mut-MED12 LM vs. MyoF adjacent to wt-MED12 LM tissues. Gene expression levels relative to the mean expression are shown as row Z-scores. (C) Significantly enriched KEGG pathways in genes differentially expressed in MyoF adjacent to mut-MED12 LM vs. MyoF adjacent to wt-MED12 LM.

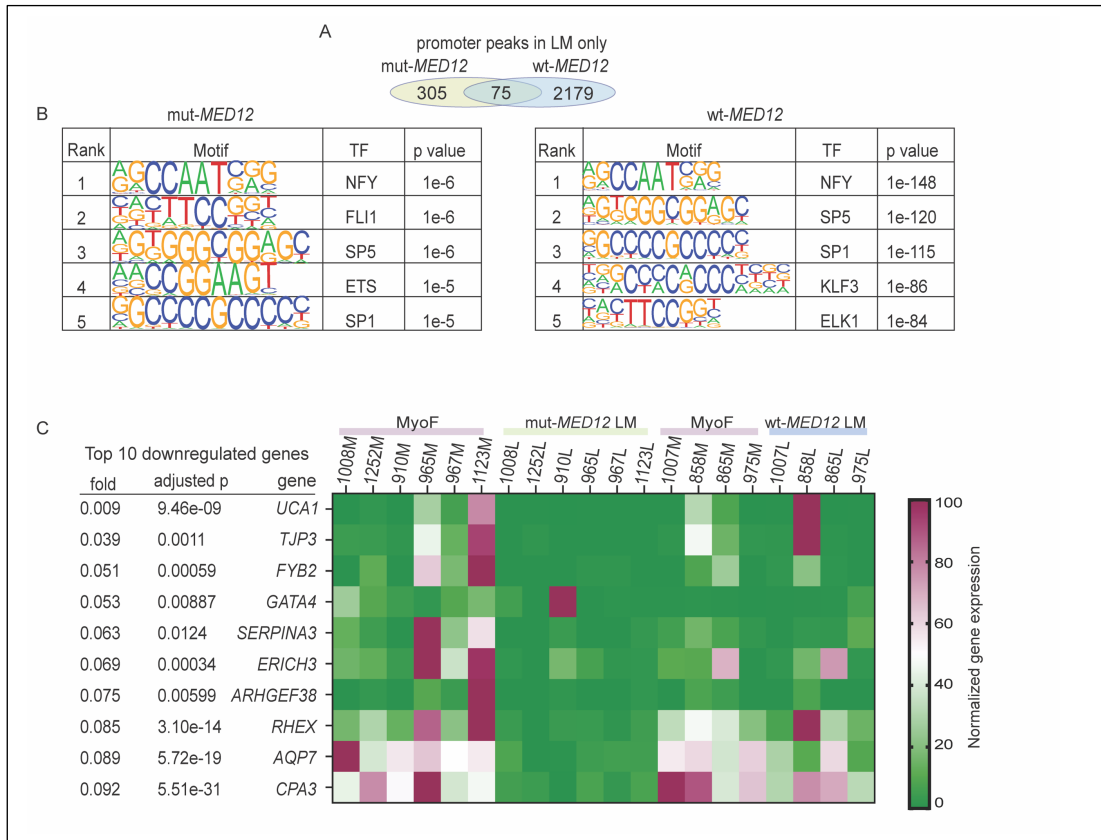

**Supplemental Figure 2:** (A) Venn diagram showing shared and unique proximal promoter MED12-binding sites between mut- and wt-MED12 LM. (B) The top 5 motifs enriched in 305 promoter peaks in mut-MED12 LM only and 2179 peaks in wt-MED12 LM only. (C) Heatmap showing percentage normalized gene expression of top 10 downregulated genes among the 913 genes only differentially expressed in mut-MED12 LM vs. MyoF and associated with adjacent MED12 binding sites shown in Figure 2E.

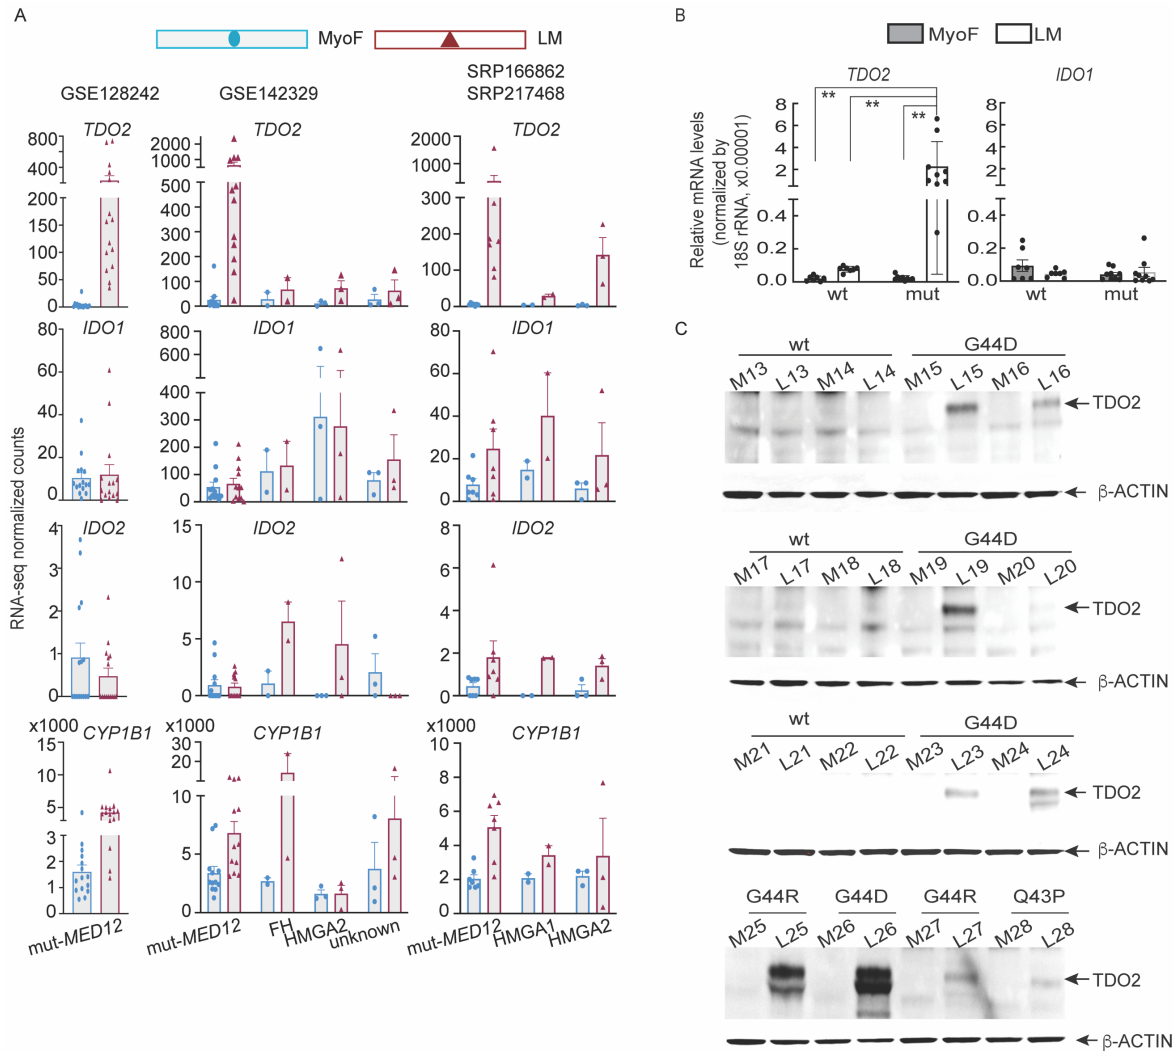

**Supplemental Figure 3: (A)** Bar graphs show normalized RNA-seq counts of genes of *TDO2*, *IDO1*, *IDO2*, and *CYP1B1* in mut-*MED12* LM and LM expressing mutations of the fumarate hydratase (*FH*) deficiency or *HMGA1* or *HMGA2* overexpression. The data were retrieved from previously published RNA-seq datasets (GSE128242, GSE142329, SRP166862, SRP217468). **(B)** RT-qPCR quantification of mRNA levels of *TDO2* and *IDO1* in wt-*MED12* LM (n=7), mut-*MED12* LM (n=9), and matched MyoF (n=16) tissues. The *TDO2* and *IDO1* mRNA levels were normalized by *18S rRNA*. \*\*p<0.01 by two-way ANOVA with multiple comparison test. **(C)** Western blot images of additional samples for Figure 3 D and E, and the full unedited gel images were shown in Supplemental Data.

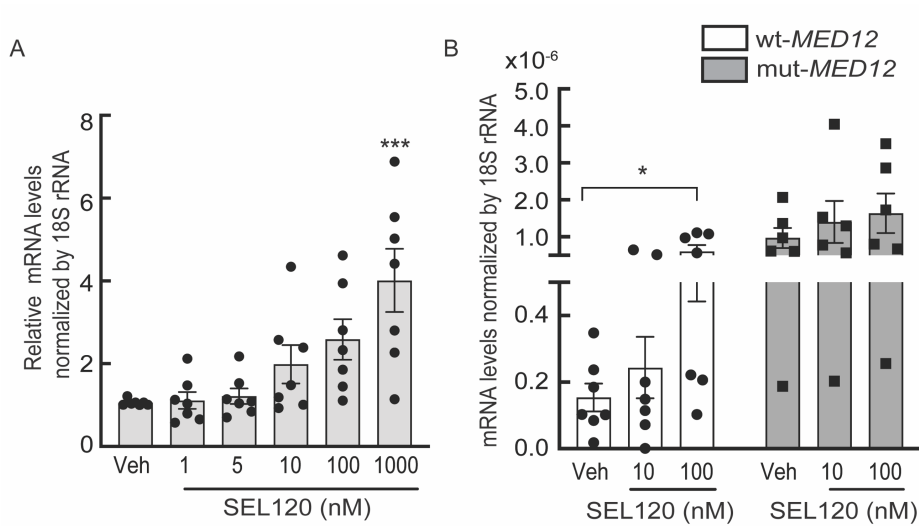

**Supplemental Figure 4: CDK8 inhibitor stimulates TDO2 expression in primary MyoF and LM cells.** (A) Effects of different doses of CDK8 inhibitor (SEL120-34A) treatment for 24 h on *TDO2* mRNA levels in MyoF cells (n=7). (B) Effects of CDK8 inhibitor treatment for 24 h on *TDO2* mRNA levels in mut- and wt-*MED12* LM cells (n=6-7). The *TDO2* mRNA levels were normalized by *18S rRNA*. \*p<0.05 and \*\*\*p<0.005 by One-way ANOVA with multiple comparison test.



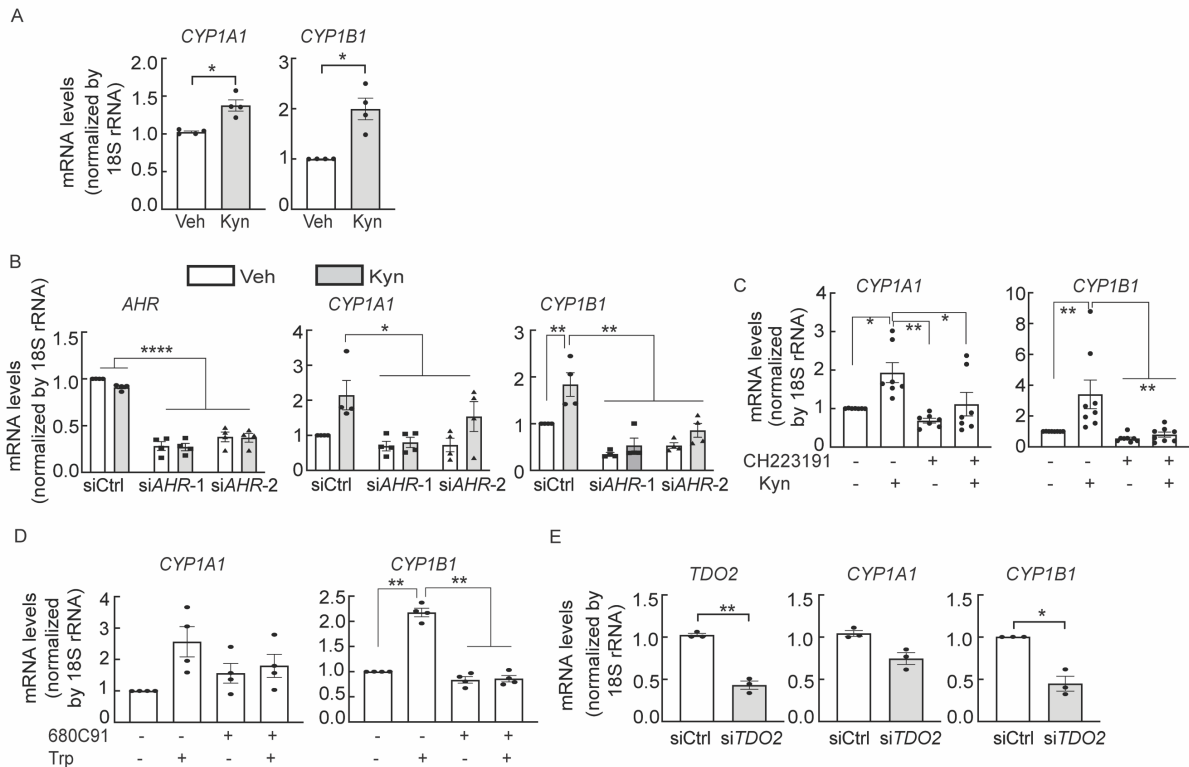

**Supplemental Figure 5: TDO2-mediated Trp metabolism activates the AHR pathway in LM cells.** (A) RT-qPCR of mRNA levels of *CYP1A1* and *CYP1B1* in LM cells treated with Kyn (200  $\mu$ M) for 24 h (n=4). (B and C) Effects of *AHR* siRNA (B; n=4) or *AHR* antagonist (C; CH223191, 10  $\mu$ M, n=7-8) on Kyn-induced *CYP1A1* and *CYP1B1* gene expression. Ctrl: control. si: siRNA. (D and E) Effects of *TDO2* inhibitor (D; 680C91, 10  $\mu$ M, n=4) or *TDO2* siRNA (E; n=3) on Trp-induced *CYP1A1* and *CYP1B1* expression. The mRNA levels of *AHR*, *TDO2*, *CYP1A1*, and *CYP1B1* were normalized by *18S rRNA*. \*p<0.05, \*\*p<0.01, \*\*\*\*p<0.0001 by Paired *t* test (A and E) or One-way (C and D) or Two-way ANOVA (B) with multiple comparison test.

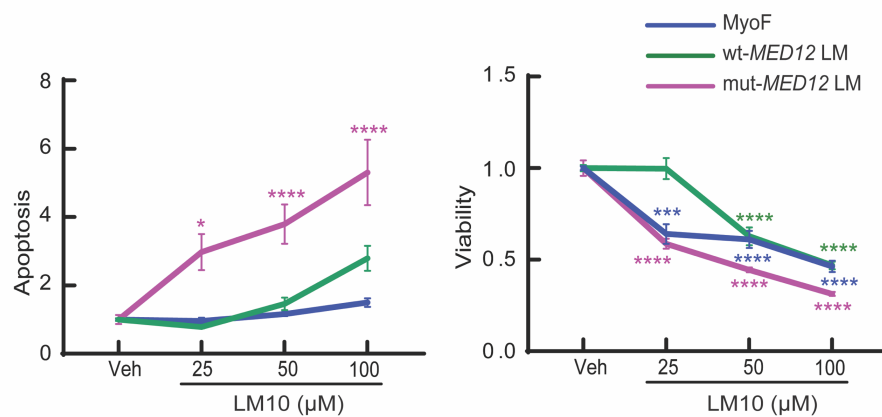

**Supplemental Figure 6: TDO2-specific inhibitor LM10 inhibits cell growth more significantly in mut-MED12 LM vs. wt-MED12 LM.** MyoF, wt-MED12 LM, and mut-MED12 LM cells were treated with different doses of LM10 for 48 h and analyzed for apoptosis and viability (n=5 for each tissue type). \*p<0.05, \*\*\* <0.005, \*\*\*\*p<0.0001 by Two-way ANOVA with multiple comparison test.

**Supplemental Table 1:** Information about the tissue samples used in this study.

| Serial No | Sample Patient record number | Age (yrs.) | Race/ Ethnicity   | Tissue                | Mutation       | Experiments used              | Smoking | No of pregnancies |
|-----------|------------------------------|------------|-------------------|-----------------------|----------------|-------------------------------|---------|-------------------|
| 1         | T65                          | 45         | European American | leiomyoma, myometrium | MED12 (G44R)   | WB, qRT-PCR                   | No      | N/A               |
| 2         | T66                          | 41         | European American | leiomyoma, myometrium | MED12 (G44D)   | WB, qRT-PCR                   | No      | N/A               |
| 3         | T71                          | 46         | African American  | leiomyoma, myometrium | MED12 (G44R)   | WB, qRT-PCR                   | No      | N/A               |
| 4         | T73                          | 41         | African American  | leiomyoma, myometrium | WT             | WB, qRT-PCR                   | No      | N/A               |
| 5         | T74                          | 39         | African American  | leiomyoma, myometrium | MED12 (Q43P)   | WB, qRT-PCR                   | No      | N/A               |
| 6         | T75                          | 36         | African American  | leiomyoma, myometrium | MED12 (G44D)   | WB, qRT-PCR                   | No      | N/A               |
| 7         | T94                          | 42         | African American  | leiomyoma, myometrium | MED12 (G44D)   | WB, qRT-PCR                   | No      | N/A               |
| 8         | T115                         | 48         | European American | leiomyoma, myometrium | MED12 (G44R)   | WB, qRT-PCR                   | No      | N/A               |
| 9         | T116                         | 39         | European American | leiomyoma, myometrium | WT             | WB, qRT-PCR                   | No      | N/A               |
| 10        | T117                         | 39         | African American  | leiomyoma, myometrium | MED12 (G44D)   | WB, qRT-PCR                   | No      | N/A               |
| 11        | T126                         | 45         | Asian             | leiomyoma, myometrium | WT             | WB, qRT-PCR                   | No      | N/A               |
| 12        | T127                         | 33         | European American | leiomyoma, myometrium | MED12 deletion | WB, qRT-PCR                   | No      | N/A               |
| 13        | 2                            | 41         | African American  | myometrium            | N/A            | qRT-PCR                       | N/A     | N/A               |
| 14        | 8                            | 40         | African American  | myometrium            | N/A            | qRT-PCR                       | N/A     | N/A               |
| 15        | 10                           | 50         | Hispanic          | leiomyoma, myometrium | MED12 (G44A)   | siRNA, Viability, Apoptosis   | N/A     | N/A               |
| 16        | 11                           | 32         | European American | myometrium            | N/A            | qRT-PCR                       | N/A     | N/A               |
| 17        | 25                           | 46         | African American  | myometrium            | N/A            | qRT-PCR                       | N/A     | N/A               |
| 18        | 27                           | 28         | African American  | myometrium            | N/A            | qRT-PCR                       | N/A     | N/A               |
| 19        | 48                           | 34         | European American | leiomyoma             | MED12 (G44S)   | qRT-PCR                       | No      | 0                 |
| 20        | 92                           | 52         | European American | leiomyoma, myometrium | MED12 (G44D)   | Viability, Apoptosis          | No      | 3                 |
| 21        | 99                           | 41         | African American  | leiomyoma, myometrium | MED12 (G44V)   | Viability, Apoptosis, qRT-PCR | No      | 0                 |
| 22        | 100                          | 41         | European American | myometrium            | WT             | qRT-PCR                       | No      | 0                 |
| 23        | 118                          | 41         | African American  | leiomyoma, myometrium | WT             | WB, qRT-PCR                   | No      | 4                 |
| 24        | 119                          | 48         | European American | leiomyoma             | WT             | Apoptosis                     | No      | 0                 |
| 25        | 719                          | 46         | European American | leiomyoma, myometrium | MED12 (G44C)   | siRNA, Apoptosis, Viability   | No      | 2                 |

|    |      |    |                   |                       |                     |                               |                    |     |
|----|------|----|-------------------|-----------------------|---------------------|-------------------------------|--------------------|-----|
| 26 | 721  | 46 | European American | leiomyoma, myometrium | MED12 (G44R)        | siRNA, Apoptosis, Viability   | No                 | 0   |
| 27 | 858  | 48 | African American  | leiomyoma, myometrium | WT                  | HPLC-MS/MS, RNA-seq, ChIP-seq | Former smoker      | 3   |
| 28 | 865  | 50 | Hispanic          | leiomyoma, myometrium | WT                  | HPLC-MS/MS, RNA-seq, ChIP-seq | No                 | 0   |
| 29 | 894  | 44 | African American  | leiomyoma, myometrium | MED12 (G44R)        | HPLC-MS/MS                    | N/A                | N/A |
| 30 | 903  | 45 | Asian             | leiomyoma, myometrium | MED12 (G44C)        | HPLC-MS/MS, WB                | No                 | 1   |
| 31 | 910  | 51 | African American  | leiomyoma, myometrium | MED12 (G44D)        | HPLC-MS/MS, RNA-seq, ChIP-seq | No                 | 0   |
| 32 | 951  | 49 | European American | leiomyoma, myometrium | WT                  | HPLC-MS/MS                    | No                 | 2   |
| 33 | 955  | 41 | European American | leiomyoma, myometrium | MED12 (G44D)        | HPLC-MS/MS, WB                | No                 | 0   |
| 34 | 959  | 50 | African American  | leiomyoma, myometrium | MED12 (G44V)        | HPLC-MS/MS                    | Former>30 days ago | N/A |
| 35 | 965  | 40 | unknown           | leiomyoma, myometrium | MED12 (G44D)        | HPLC-MS/MS, RNA-seq, ChIP-seq | No                 | 0   |
| 36 | 967  | 43 | unknown           | leiomyoma, myometrium | MED12 (G44D)        | HPLC-MS/MS, RNA-seq, ChIP-seq | No                 | 4   |
| 37 | 975  | 40 | European American | leiomyoma, myometrium | WT                  | RNA-seq, ChIP-seq             | No                 | 0   |
| 38 | 1007 | 48 | African American  | leiomyoma, myometrium | WT                  | HPLC-MS/MS, WB, RNA-seq       | No                 | 5   |
| 39 | 1008 | 47 | African American  | leiomyoma, myometrium | MED12 (G44D)        | HPLC-MS/MS, WB, RNA-seq       | One pack/day       | 1   |
| 40 | 1013 | 46 | unknown           | leiomyoma, myometrium | MED12 (G44S)        | HPLC-MS/MS                    | No                 | N/A |
| 41 | 1019 | 43 | African American  | leiomyoma, myometrium | MED12 (G44D)        | HPLC-MS/MS, WB                | No                 | 3   |
| 42 | 1021 | 43 | unknown           | leiomyoma, myometrium | MED12 (G44D)        | HPLC-MS/MS                    | No                 | 4   |
| 43 | 1024 | 46 | African American  | leiomyoma, myometrium | MED12 (G44V)        | HPLC-MS/MS                    | Quit in 2007       | 3   |
| 44 | 1038 | 49 | European American | leiomyoma, myometrium | MED12 (G44D)        | HPLC-MS/MS                    | 3-4/day            | 0   |
| 45 | 1041 | 49 | European American | leiomyoma, myometrium | WT                  | HPLC-MS/MS                    | No                 | 0   |
| 46 | 1048 | 45 | European American | leiomyoma, myometrium | WT                  | WB                            | No                 | 2   |
| 47 | 1056 | 48 | European American | leiomyoma, myometrium | WT                  | HPLC-MS/MS, WB                | No                 | 0   |
| 48 | 1109 | 45 | European American | leiomyoma, myometrium | MED12 (IVS 1-8 T>A) | HPLC-MS/MS, WB                | No                 | 2   |
| 49 | 1123 | 48 | unknown           | leiomyoma, myometrium | MED12 (G44D)        | HPLC-MS/MS, WB, RNA-seq       | No                 | 1   |
| 50 | 1147 | 46 | European American | leiomyoma, myometrium | MED12 insertion     | HPLC-MS/MS                    | No                 | 2   |
| 51 | 1148 | 48 | unknown           | leiomyoma, myometrium | WT                  | HPLC-MS/MS                    | Former smoker      | 4   |
| 52 | 1172 | 41 | European American | leiomyoma, myometrium | WT                  | Viability                     | No                 | 1   |

|    |      |    |                   |                       |                     |                                      |               |     |
|----|------|----|-------------------|-----------------------|---------------------|--------------------------------------|---------------|-----|
| 53 | 1174 | 47 | European American | leiomyoma, myometrium | MED12 (G44D)        | HPLC-MS/MS                           | No            | 0   |
| 54 | 1220 | 48 | African American  | leiomyoma             | WT                  | qRT-PCR, WB                          | No            | 4   |
| 55 | 1221 | 43 | European American | leiomyoma, myometrium | MED12 (IVS 1-8 T>A) | Apoptosis, Viability, HPLC-MS/MS, WB | Former smoker | N/A |
| 56 | 1237 | 47 | African American  | leiomyoma             | MED12 (G44D)        | Apoptosis                            | No            | 2   |
| 57 | 1238 | 44 | European American | leiomyoma             | WT                  | Viability, Apoptosis, WB             | No            | 1   |
| 58 | 1244 | 48 | Asian             | leiomyoma, myometrium | N/A                 | Viability                            | No            | 4   |
| 59 | 1252 | 49 | African American  | leiomyoma, myometrium | MED12 (G44D)        | HPLC-MS/MS, WB, RNA-seq              | Former smoker | 3   |
| 60 | 1255 | 48 | African American  | leiomyoma, myometrium | WT                  | HPLC-MS/MS                           | No            | 2   |
| 61 | 1256 | 35 | Asian             | leiomyoma             | MED12 (G44A)        | WB                                   | No            | 0   |
| 62 | 1257 | 37 | African American  | leiomyoma             | MED12 (Deletion)    | Apoptosis                            | Occasionally  | 1   |
| 63 | 1260 | 46 | European American | leiomyoma, myometrium | MED12 (G44R)        | HPLC-MS/MS, WB                       | No            | N/A |
| 64 | 1267 | 48 | African American  | leiomyoma, myometrium | MED12 (G44D)        | WB                                   | No            | 4   |
| 65 | 1271 | 39 | European American | leiomyoma             | WT                  | WB                                   | No            | 0   |
| 66 | 1274 | 39 | African American  | leiomyoma             | MED12 (G44D)        | Apoptosis                            | Marijuana     | N/A |
| 67 | 1281 | 54 | African American  | leiomyoma, myometrium | MED12 (G44D)        | HPLC-MS/MS, WB                       | No            | 2   |
| 68 | 1286 | 37 | European American | leiomyoma             | MED12 (G44D)        | Apoptosis                            | No            | 0   |
| 69 | 1287 | 45 | European American | leiomyoma             | WT                  | ChIP-RT, Viability, Apoptosis        | No            | 2   |
| 70 | 1290 | 43 | European American | leiomyoma             | MED12 (G44D)        | qRT-PCR, siRNA, Apoptosis            | No            | 0   |
| 71 | 1291 | 32 | Unknown           | leiomyoma             | MED12 (G44V)        | siRNA, qRT-PCR, Apoptosis            | No            | N/A |
| 72 | 1296 | 48 | African American  | leiomyoma, myometrium | MED12 (G44A)        | qRT-PCR, Viability, HPLC-MS/MS       | No            | N/A |
| 73 | 1298 | 47 | African American  | leiomyoma             | WT                  | Viability                            | No            | N/A |
| 74 | 1305 | 39 | European American | leiomyoma             | WT                  | qRT-PCR, siRNA, Apoptosis            | No            | 0   |
| 75 | 1307 | 47 | European American | leiomyoma             | WT                  | qRT-PCR                              | No            | N/A |
| 76 | 1316 | 42 | Asian             | leiomyoma, myometrium | N/A                 | Viability, WB, Apoptosis             | No            | 0   |
| 77 | 1323 | 29 | European American | leiomyoma             | WT                  | ChIP-RT, Apoptosis                   | No            | N/A |
| 78 | 1331 | 43 | Unknown           | leiomyoma, myometrium | N/A                 | Viability                            | Former        | N/A |
| 79 | 1336 | 42 | African American  | leiomyoma             | WT                  | siRNA                                | No            | 0   |

|     |        |     |                   |                       |              |                                           |               |     |
|-----|--------|-----|-------------------|-----------------------|--------------|-------------------------------------------|---------------|-----|
| 80  | 1342   | 40  | African American  | leiomyoma             | WT           | ChIP-RT, qRT-PCR, Apoptosis               | No            | 1   |
| 81  | 1345   | 43  | Unknown           | leiomyoma, myometrium | MED12 (G44D) | AHR Localization, siRNA, HPLC-MS/MS       | No            | N/A |
| 82  | 1350   | 44  | African American  | leiomyoma             | Q43P         | AHR Localization                          | No            | 0   |
| 83  | 1351   | 45  | African American  | leiomyoma, myometrium | MED12 (G44C) | qRT-PCR, Apoptosis, HPLC-MS/MS, Viability | No            | 4   |
| 84  | 1361   | 38  | European American | leiomyoma, myometrium | MED12 (G44V) | WB, Apoptosis                             | No            | N/A |
| 85  | 1365   | 41  | Asian             | leiomyoma             | MED12 (G44R) | qRT-PCR, Apoptosis                        | No            | N/A |
| 86  | 1366   | 50  | African American  | leiomyoma             | MED12 (G44V) | Apoptosis                                 | No            | N/A |
| 87  | 1372   | 50  | African American  | leiomyoma, myometrium | WT           | Apoptosis                                 | No            | 2   |
| 88  | 1377   | 36  | European American | leiomyoma, myometrium | WT           | Viability, Apoptosis                      | No            | N/A |
| 89  | 1388   | 41  | European American | leiomyoma, myometrium | MED12 (G44D) | ChIP-RT, Viability                        | No            | N/A |
| 90  | 1390   | 40  | European American | normal myometrium     | N/A          | Viability                                 | No            | N/A |
| 91  | 1391   | 45  | African American  | leiomyoma, myometrium | MED12 (G44D) | ChIP-RT, Viability                        | Former smoker | N/A |
| 92  | 1392   | 42  | African American  | leiomyoma, myometrium | WT           | Apoptosis, Viability                      | Former smoker | 2   |
| 93  | 1400   | 43  | African American  | leiomyoma, myometrium | MED12 (G44D) | qRT-PCR                                   | Yes           | N/A |
| 94  | 1428   | 46  | Unknown           | leiomyoma             | WT           | qRT-PCR, WB                               | No            | 1   |
| 95  | 1432   | 42  | Unknown           | leiomyoma             | WT           | qRT-PCR                                   | No            | 3   |
| 96  | 1470   | 44  | Unknown           | leiomyoma, myometrium | WT           | WB, qRT-PCR                               | No            | 3   |
| 97  | 1482   | 42  | Unknown           | leiomyoma, myometrium | WT           | WB, qRT-PCR                               | No            | 2   |
| 98  | 1488   | 49  | European American | leiomyoma, myometrium | WT           | WB, qRT-PCR                               | No            | 3   |
| 99  | 1490   | 53  | Unknown           | leiomyoma, myometrium | WT           | WB, qRT-PCR                               | No            | 0   |
| 100 | 1506   | 48  | African American  | Leiomyoma             | WT           | qRT-PCR                                   | No            | 1   |
| 101 | 1525   | 51  | European American | Leiomyoma             | MED12 (G44D) | qRT-PCR                                   | Yes           | N/A |
| 102 | 1528   | 35  | African American  | Leiomyoma             | MED12 (G44V) | qRT-PCR                                   | No            | 2   |
| 103 | 1533   | 54  | African American  | leiomyoma             | MED12 (G44D) | qRT-PCR                                   | No            | 5   |
| 104 | 1548   | 56  | Asian             | leiomyoma             | WT           | qRT-PCR                                   | No            | 1   |
| 105 | 20652  | N/A | Unknown           | leiomyoma             | WT           | qRT-PCR, WB                               | N/A           | N/A |
| 106 | 455213 | N/A | Unknown           | leiomyoma             | MED12 (G44D) | WB, qRT-PCR                               | N/A           | N/A |

## Supplemental Table 19

### Primers

| Gene name       | Company                     | Assay ID             | Product name                  |
|-----------------|-----------------------------|----------------------|-------------------------------|
| <i>TBP</i>      | Thermo Fisher Scientific    | 4331182              | TaqMan real-time PCR primer   |
| <i>GAPDH</i>    | Integrated DNA Technologies | Hs.PT.39a.22214836   | PrimeTime Standard qPCR Assay |
| <i>AHR</i>      | Integrated DNA Technologies | Hs.PT.56a.38998805   | PrimeTime Standard qPCR Assay |
| <i>TDO2</i>     | Integrated DNA Technologies | Hs.PT.58.3092178     | PrimeTime Standard qPCR Assay |
| <i>CYP1A1</i>   | Integrated DNA Technologies | Hs.PT.58.219047      | PrimeTime Standard qPCR Assay |
| <i>CYP1B1</i>   | Integrated DNA Technologies | Hs.PT.58.25328727.g  | PrimeTime Standard qPCR Assay |
| <i>IDO1</i>     | Integrated DNA Technologies | Hs.PT.58.924731      | PrimeTime Standard qPCR Assay |
| <i>IDO2</i>     | Integrated DNA Technologies | Hs.PT.58.3013208     | PrimeTime Standard qPCR Assay |
| <i>18S rRNA</i> | Integrated DNA Technologies | Hs.PT.39a.22214856.g | PrimeTime Standard qPCR Assay |

| Gene name     | Company                     | Sequence 5'--3'                                          | Usage     |
|---------------|-----------------------------|----------------------------------------------------------|-----------|
| <i>CYP1A1</i> | Integrated DNA Technologies | CCGCCACCCTTCGACA-Forward<br>CAGGCGTTGCGTGAGA-Reverse     | ChIP-qPCR |
| <i>CYP1B1</i> | Integrated DNA Technologies | TGTCAGGTGCCGTGAGAA-Foward<br>CGAACTTTATCGGGTTGAA-Reverse | ChIP-qPCR |

### siRNAs and antibodies

| Name                                               | Company                 | Cat. Number      |
|----------------------------------------------------|-------------------------|------------------|
| ON-TARGETplus Non-targeting Pool                   | Dharmacon               | D-001810-10-05   |
| ON-TARGETplus Human <i>TDO2</i> siRNA - SMARTpool  | Dharmacon               | L-008506-01-0005 |
| ON-TARGETplus Human <i>AHR</i> siRNA - Individual  | Dharmacon               | J-004990-05-0005 |
| ON-TARGETplus Human <i>AHR</i> siRNA - Individual  | Dharmacon               | J-004990-06-0005 |
| Donkey anti-Rabbit IgG (H+L) Highly Cross-Adsorbed | Thermofisher scientific | A32754           |

|                           |                    |                |
|---------------------------|--------------------|----------------|
| AHR, RPT1 (for ICC)       | Genetex            | GTX22770       |
| AHR (for CHIP)            | Enzo life sciences | BML-SA210-0100 |
| Cyclin D1                 | Cell signalling    | 2922S          |
| TDO2                      | Proteintech        | 15880-1-AP     |
| HRP-conjugated beta actin | Proteintech        | HRP-66009      |



### Additional references

1. Makinen N, Mehine M, Tolvanen J, Kaasinen E, Li Y, Lehtonen HJ, et al. MED12, the mediator complex subunit 12 gene, is mutated at high frequency in uterine leiomyomas. *Science*. 2011;334(6053):252-5.
2. Kampjarvi K, Park MJ, Mehine M, Kim NH, Clark AD, Butzow R, et al. Mutations in Exon 1 highlight the role of MED12 in uterine leiomyomas. *Hum Mutat*. 2014;35(9):1136-41.
3. Taylor RT, Wang F, Hsu EL, and Hankinson O. Roles of coactivator proteins in dioxin induction of CYP1A1 and CYP1B1 in human breast cancer cells. *Toxicol Sci*. 2009;107(1):1-8.
4. Buyukcelebi K, Chen X, Abdula F, Elkafas H, Duval AJ, Ozturk H, et al. Engineered MED12 mutations drive leiomyoma-like transcriptional and metabolic programs by altering the 3D genome compartmentalization. *Nat Commun*. 2023;14(1):4057.

Full unedited gel for Figure 3D

Band in the manuscript

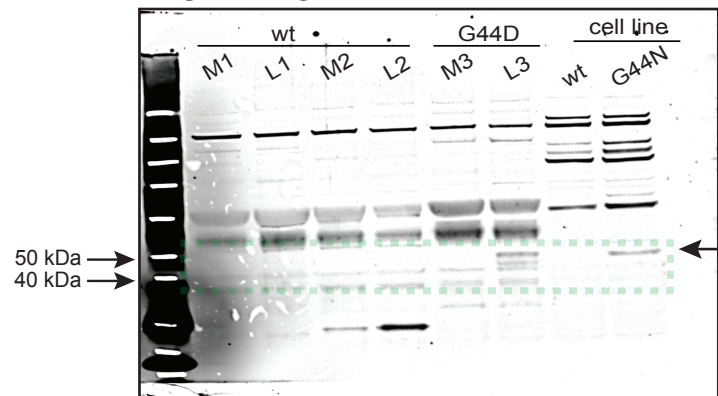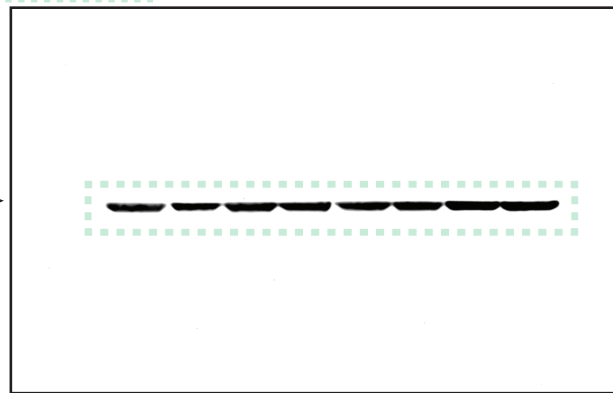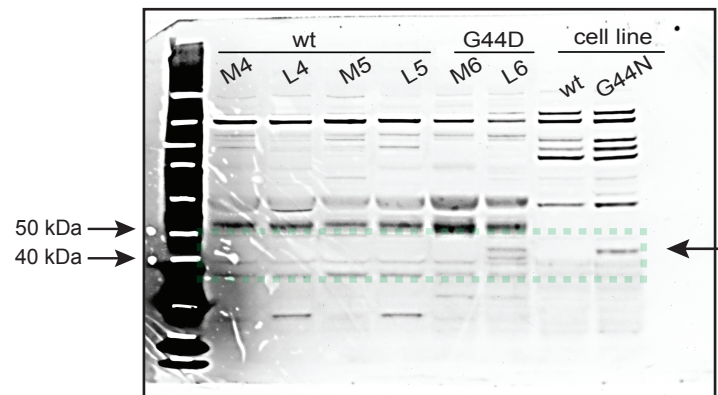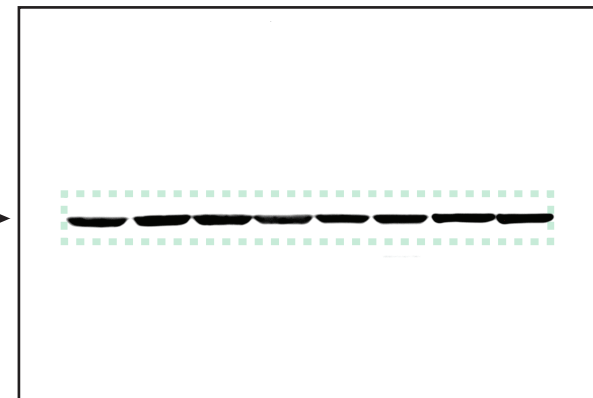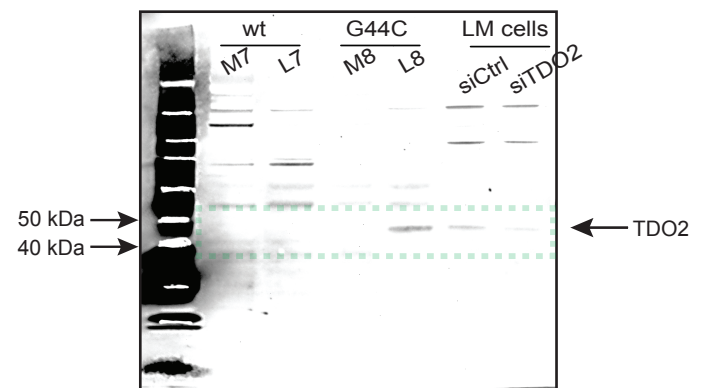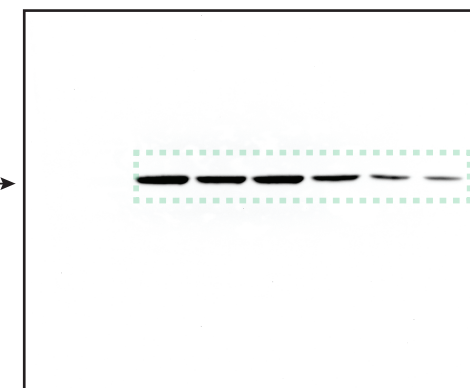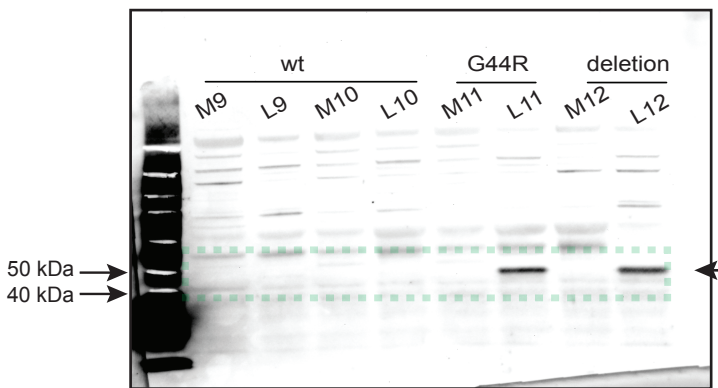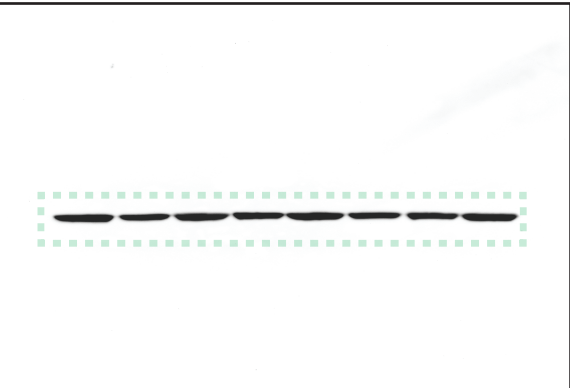

Full unedited gel for Supplemental Figure 3C

Band in the manuscript

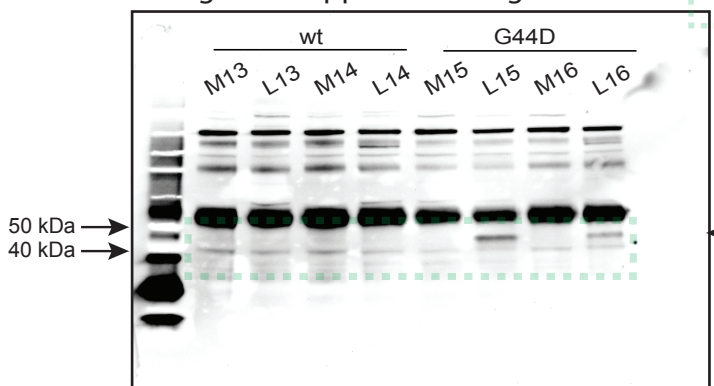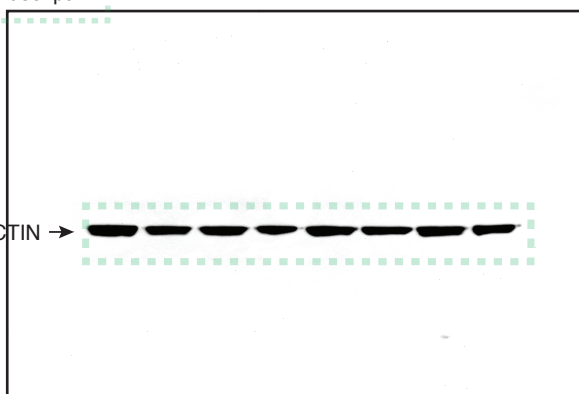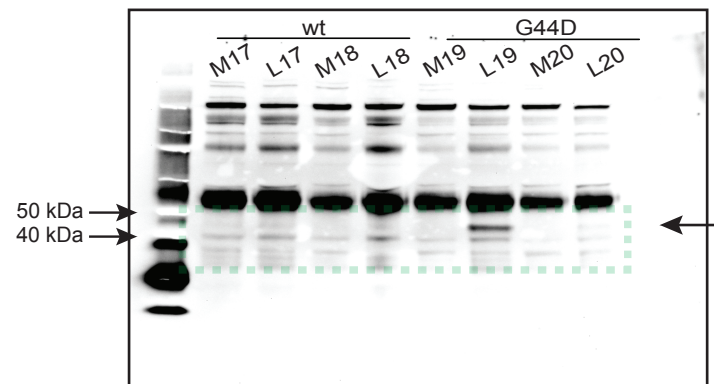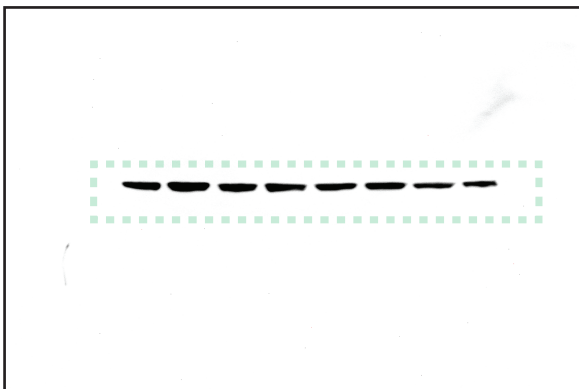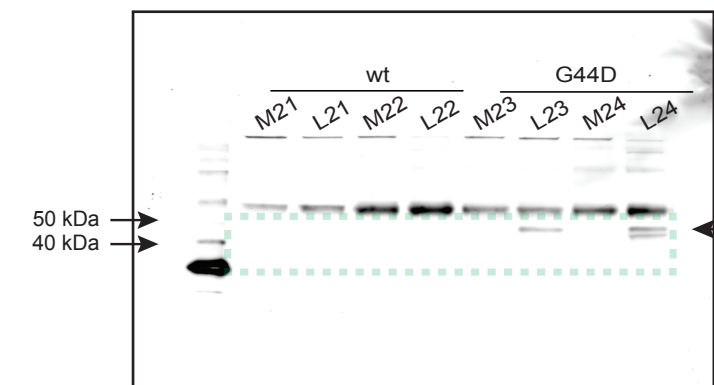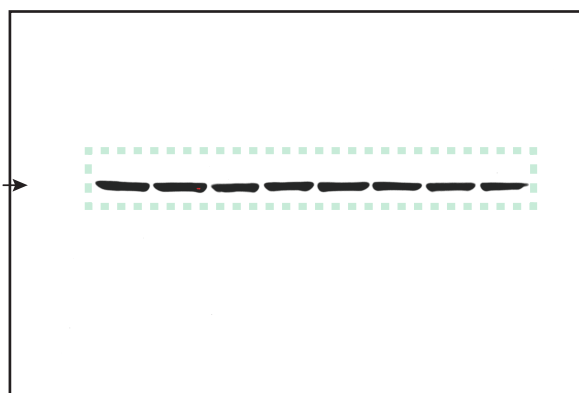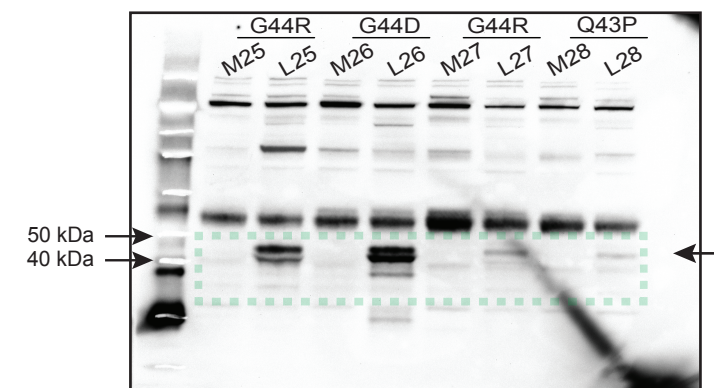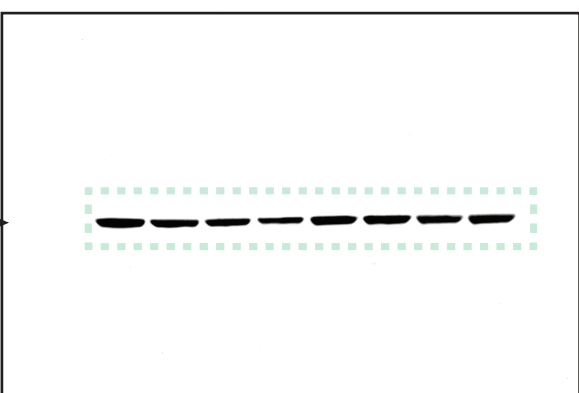

Full unedited gel for Figure 4C

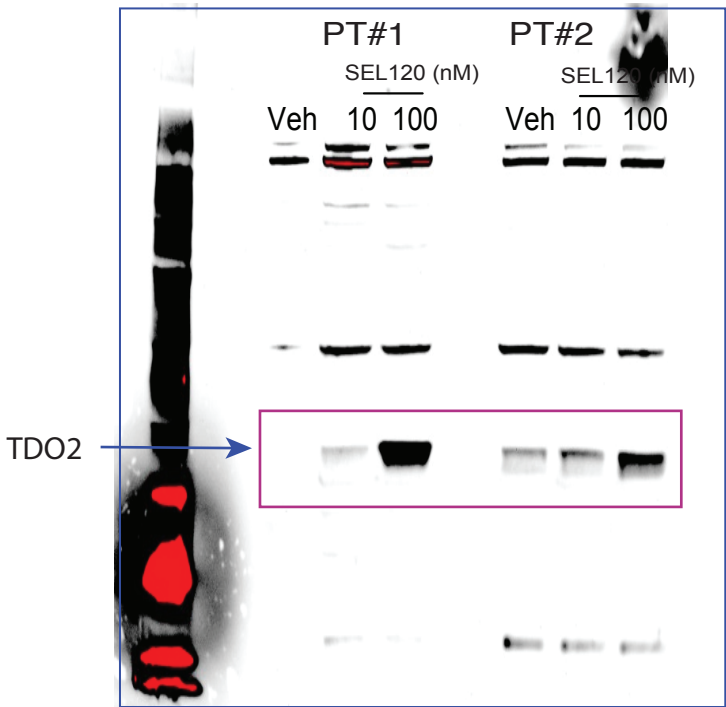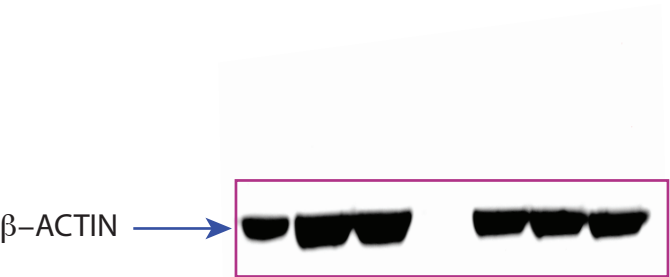

bands in the manuscript

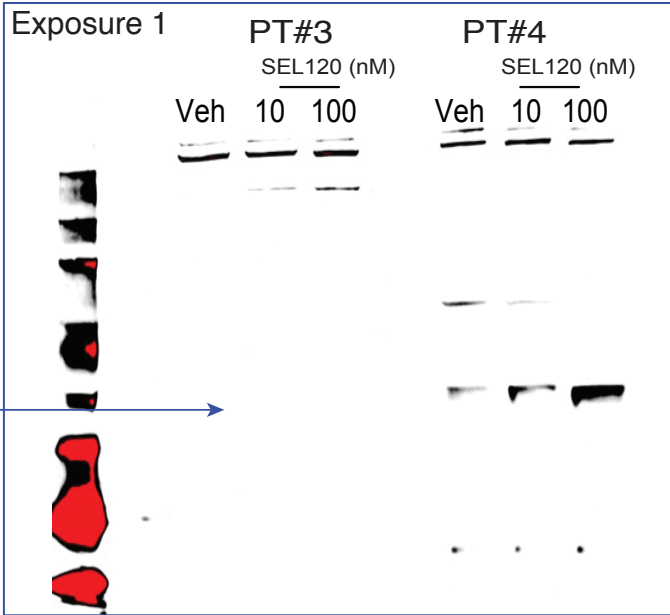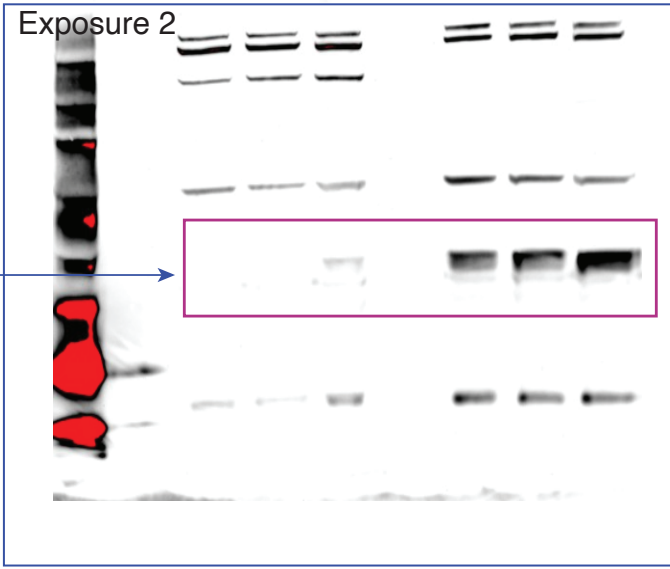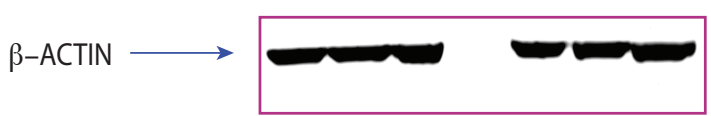

Full unedited gel for Figure 6C

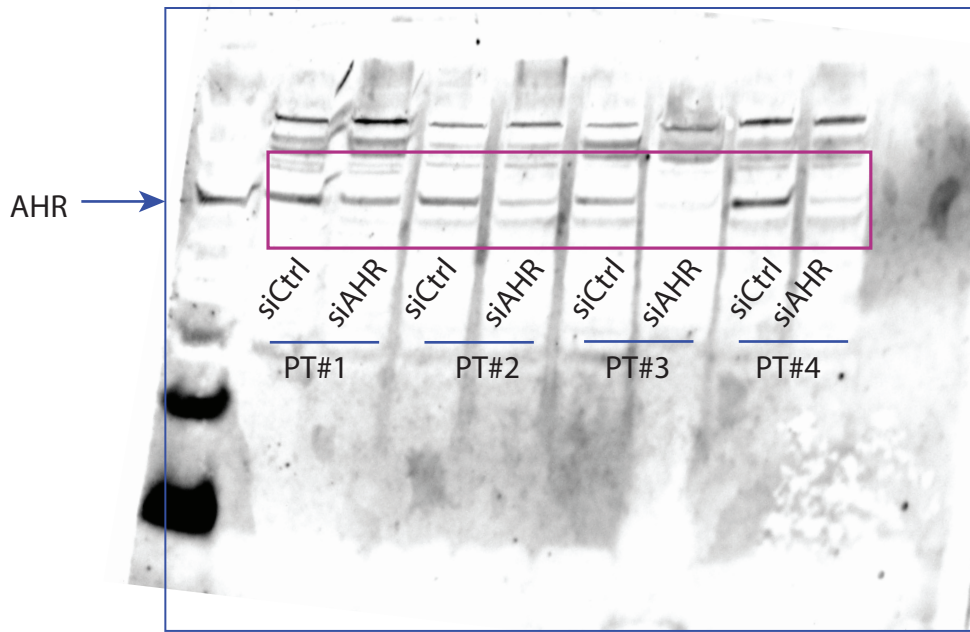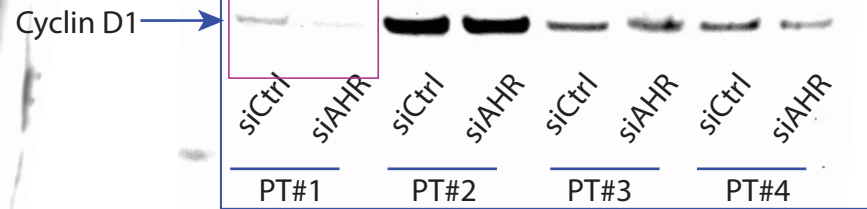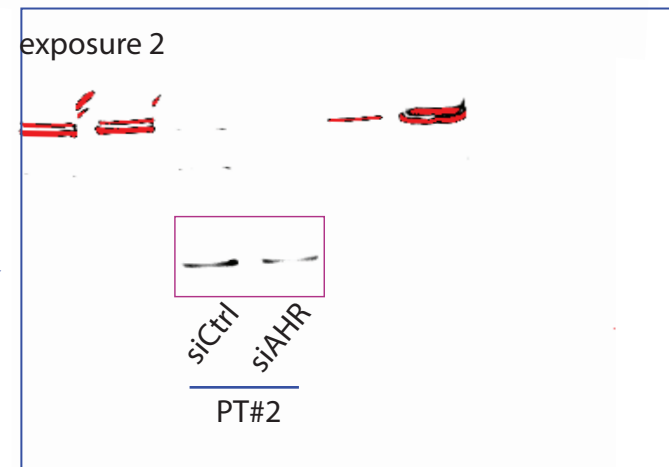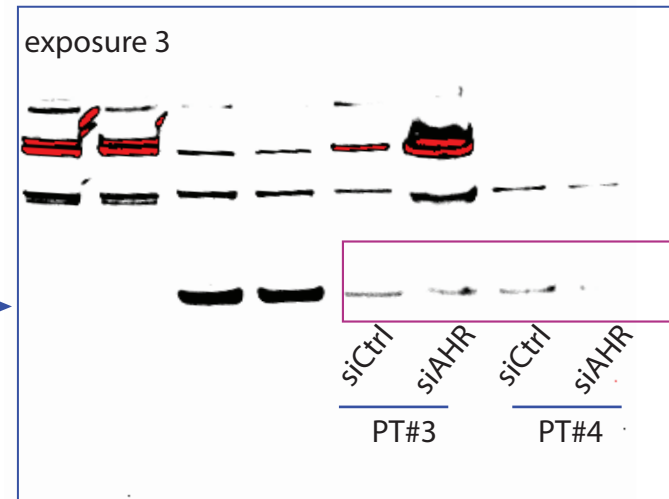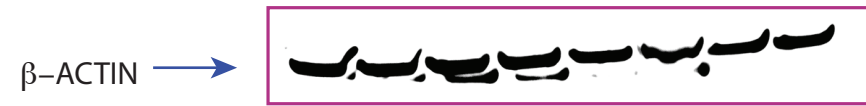

bands in the manuscript

Full unedited gel for Figure 6F

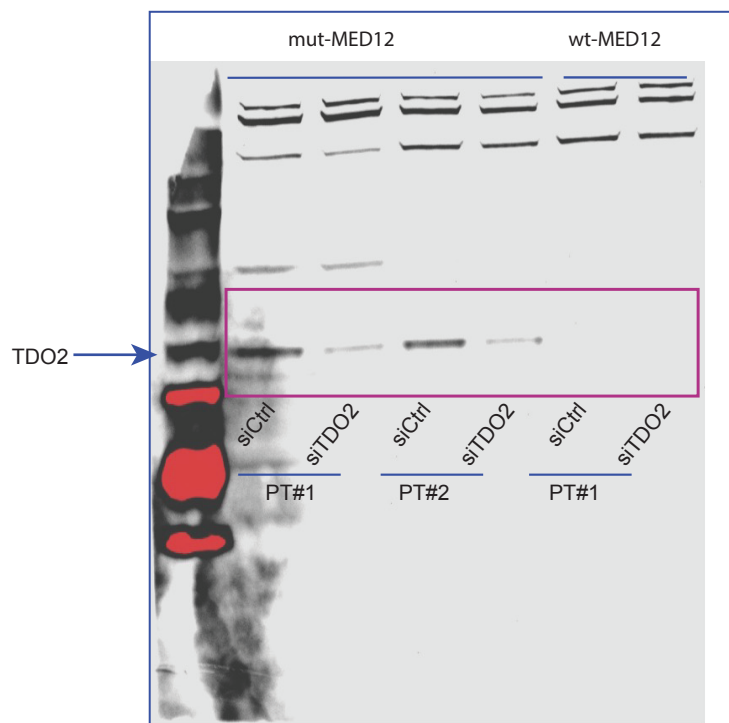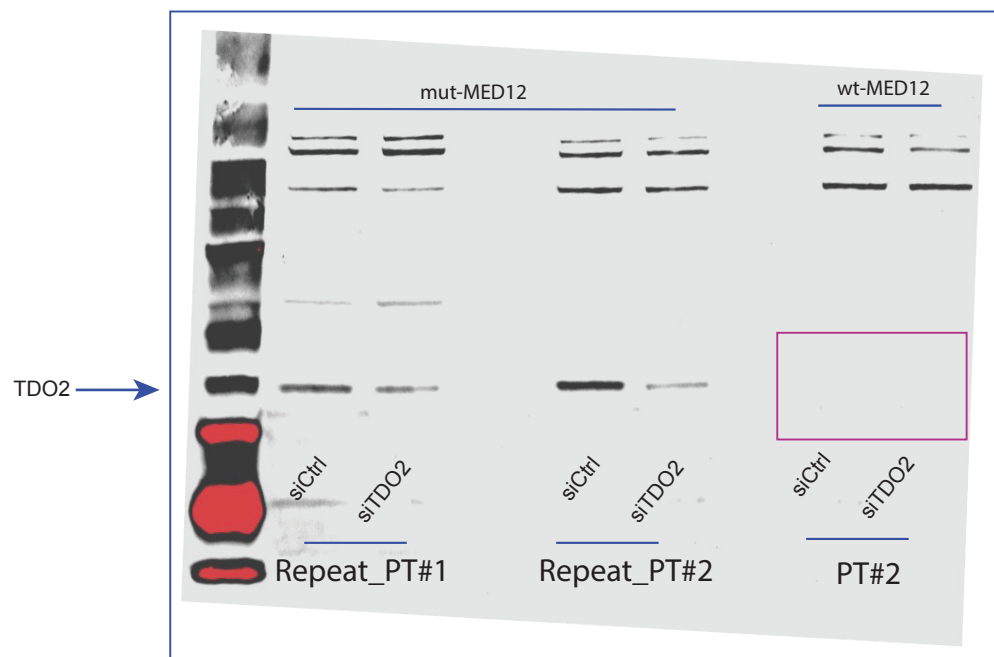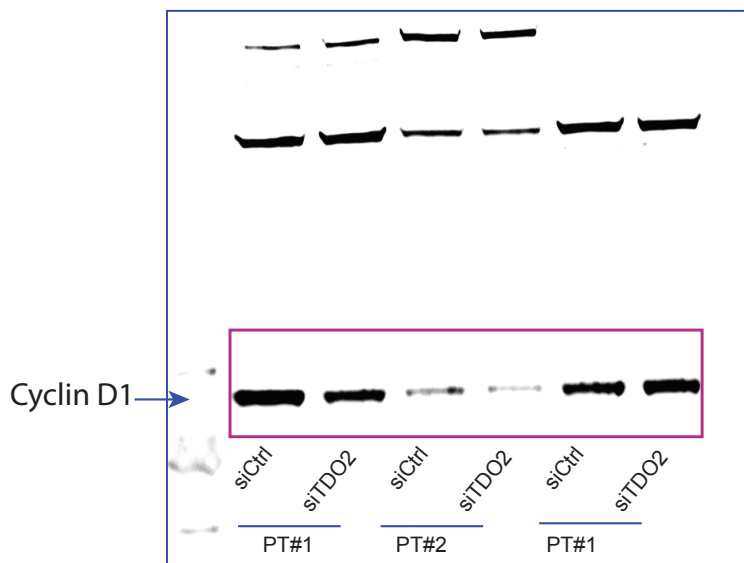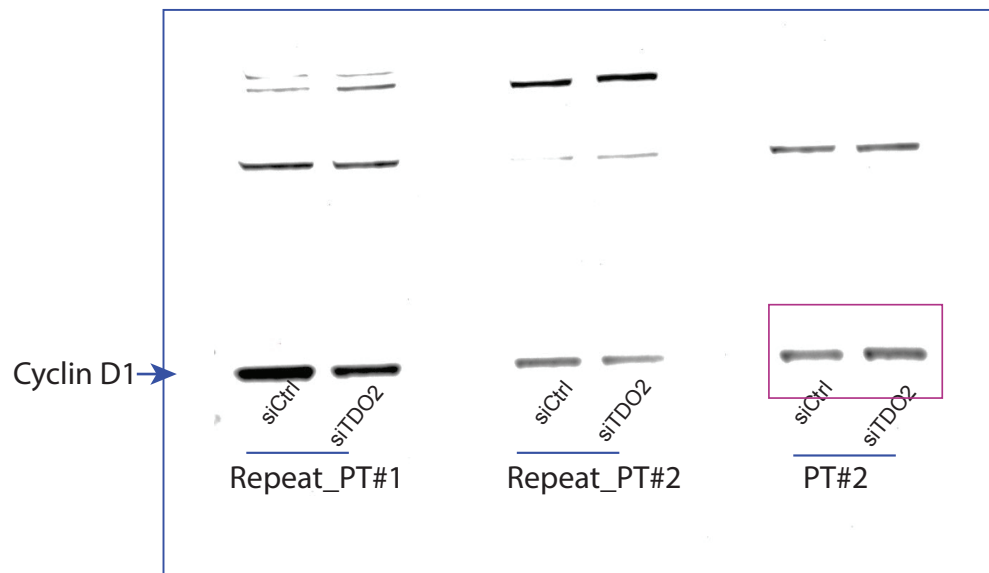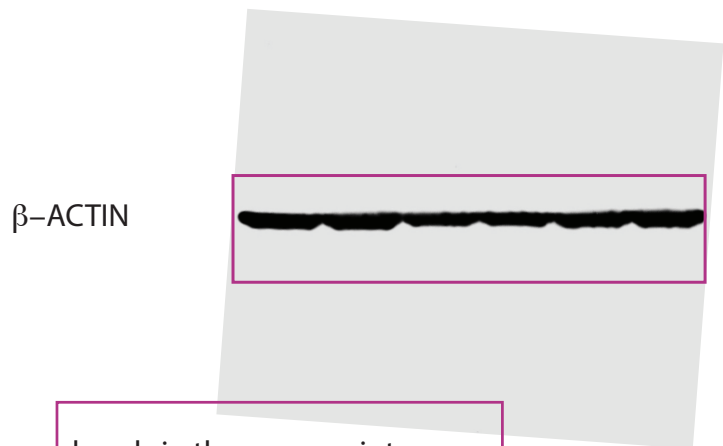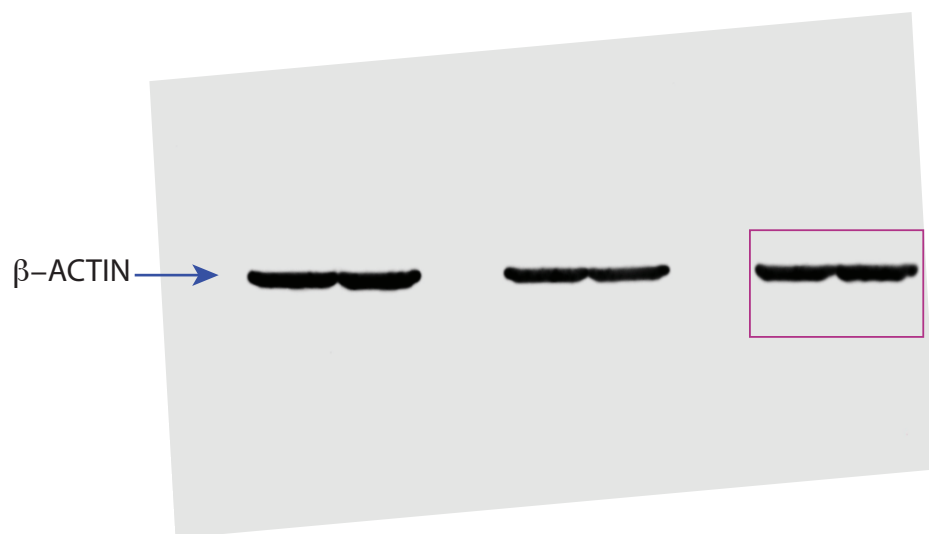

bands in the manuscript

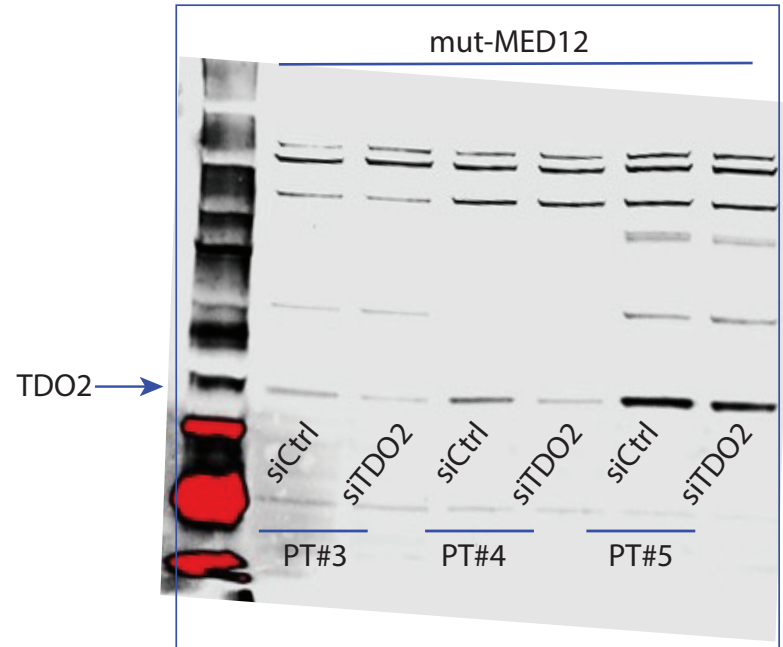

TDO2 →

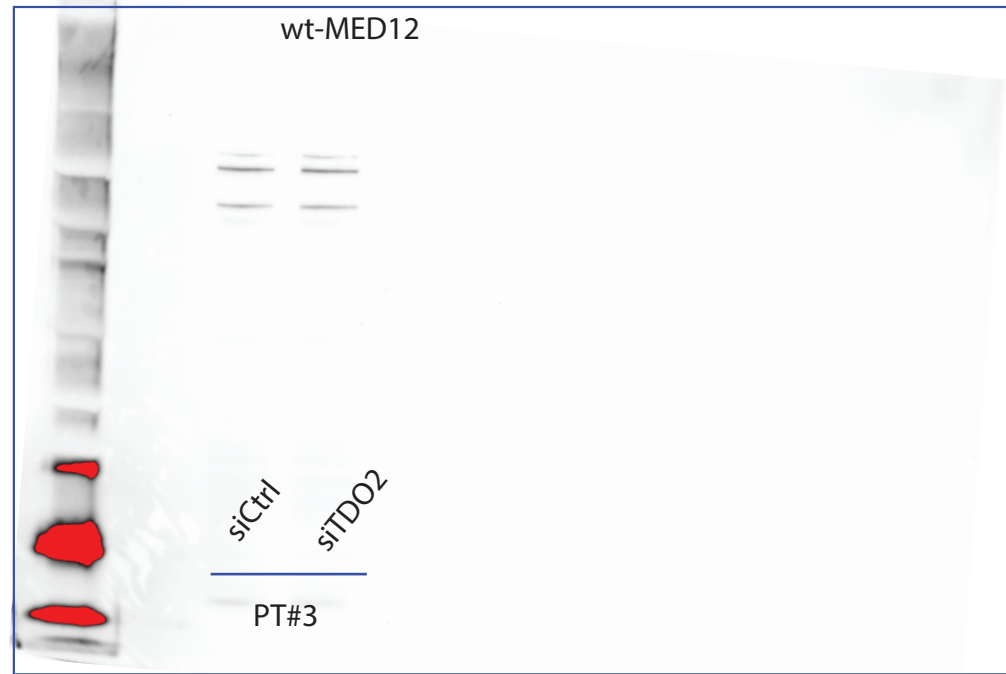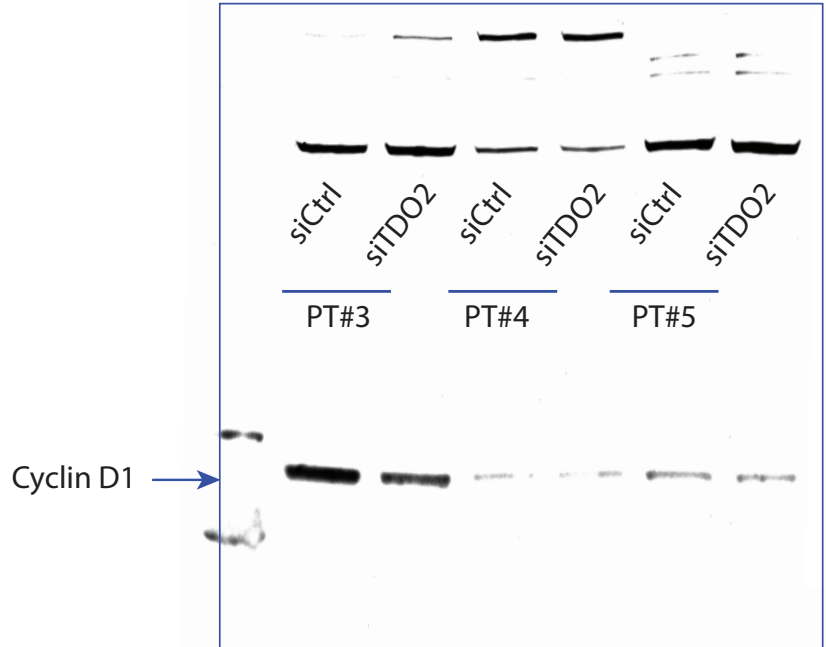

Cyclin D1 →

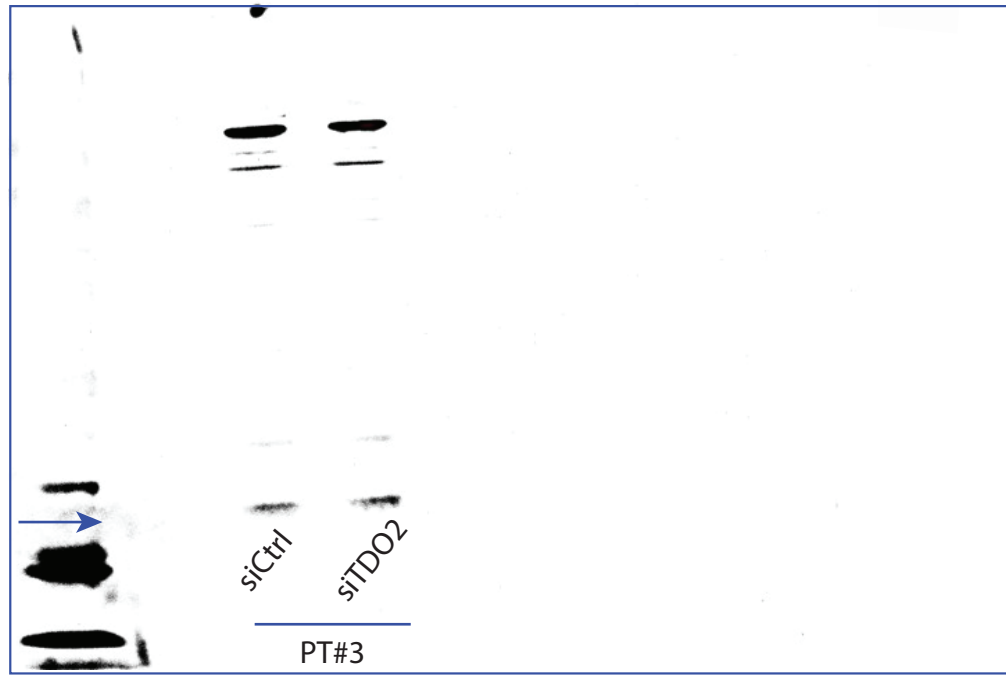

β-ACTIN →

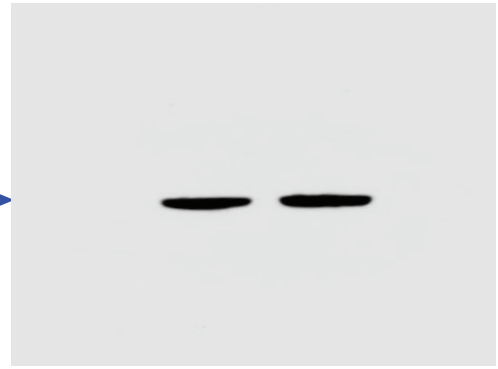

Supplement: sd1 [file 1]
