# Supplementary material for: MED12 mutation activates the tryptophan/kynurenine/AHR pathway to promote growth of uterine leiomyomas
Source: JCI journal article supplement (doi:10.1172/jci.insight.171305), 2023-08-22
Supplement: sd1 [file 1]

You are being redirected.
